# Supplementary material for: Prevalence of pulmonary tuberculosis among prison inmates: A cross-sectional survey at the Correctional and Detention Facility of Abidjan, Côte d'Ivoire
Source: PubMed Central journal article supplement (PMC5536365; doi:10.1371/journal.pone.0181995), 2017-07-31
Supplement: pone.0181995.s001.pdf [file pone.0181995.s001.pdf]

|                                             |                                                                                                                                                                                                                                                                                                                                                                                                                                                                                                                                                                                                                                                                                                                                                                                                                               |       |
|---------------------------------------------|-------------------------------------------------------------------------------------------------------------------------------------------------------------------------------------------------------------------------------------------------------------------------------------------------------------------------------------------------------------------------------------------------------------------------------------------------------------------------------------------------------------------------------------------------------------------------------------------------------------------------------------------------------------------------------------------------------------------------------------------------------------------------------------------------------------------------------|-------|
| Q 0.1                                       | <b>Date of inclusion:</b>  __ __ __  /  __ __ __  /  __ __ __   __ __ __                                                                                                                                                                                                                                                                                                                                                                                                                                                                                                                                                                                                                                                                                                                                                      |       |
| Q 0.2                                       | <b>Building:</b> <input type="checkbox"/> Building C <sup>1</sup> <input type="checkbox"/> Women's building <sup>2</sup> <input type="checkbox"/> CAT <sup>3</sup><br><input type="checkbox"/> Infirmary <sup>4</sup> <input type="checkbox"/> Other building <sup>5</sup>                                                                                                                                                                                                                                                                                                                                                                                                                                                                                                                                                    | __    |
| Q 0.3                                       | <b>Floor:</b>                                                                                                                                                                                                                                                                                                                                                                                                                                                                                                                                                                                                                                                                                                                                                                                                                 | __    |
| Q 0.4                                       | <b>Cell:</b>                                                                                                                                                                                                                                                                                                                                                                                                                                                                                                                                                                                                                                                                                                                                                                                                                  | __ __ |
| Q 0.5                                       | <b>Number of inmates per cell:</b>  __ __ __  <input type="checkbox"/> Does not know <sup>99</sup>                                                                                                                                                                                                                                                                                                                                                                                                                                                                                                                                                                                                                                                                                                                            |       |
| <b>1- SOCIO-DEMOGRAPHIC CHARACTERISTICS</b> |                                                                                                                                                                                                                                                                                                                                                                                                                                                                                                                                                                                                                                                                                                                                                                                                                               |       |
| Q 1.1                                       | <b>Gender:</b> <input type="checkbox"/> Male <sup>1</sup> <input type="checkbox"/> Female <sup>2</sup>                                                                                                                                                                                                                                                                                                                                                                                                                                                                                                                                                                                                                                                                                                                        | __    |
| Q 1.2                                       | <b>Date of birth:</b>  __ __ __  /  __ __ __  /  __ __ __   __ __ __  <b>Or Age:</b>  __ __ __  years<br><input type="checkbox"/> Does not know <sup>99</sup>                                                                                                                                                                                                                                                                                                                                                                                                                                                                                                                                                                                                                                                                 |       |
| Q 1.3                                       | <b>Area of residence before entering MACA:</b><br><input type="checkbox"/> Abobo <sup>1</sup> <input type="checkbox"/> Adjamé / Williamsville <sup>2</sup> <input type="checkbox"/> Attécoubé/Lokodjoro <sup>3</sup> <input type="checkbox"/> Cocody/Deux Plateau <sup>4</sup><br><input type="checkbox"/> Koumassi <sup>5</sup> <input type="checkbox"/> Marcory <sup>6</sup> <input type="checkbox"/> Plateau <sup>7</sup> <input type="checkbox"/> Port-Bouët/Vridi <sup>8</sup> <input type="checkbox"/> Treichville <sup>9</sup> <input type="checkbox"/> Yopougon <sup>10</sup><br><input type="checkbox"/> Bingerville <sup>11</sup> <input type="checkbox"/> Anyama <sup>12</sup> <input type="checkbox"/> Grand Bassam <sup>13</sup> <input type="checkbox"/> Autre <sup>14</sup><br><i>If other, specify:</i> _____ | __ __ |
| Q 1.4                                       | <b>Nationality:</b> <input type="checkbox"/> Ivorian <sup>1</sup> <input type="checkbox"/> Other <sup>2</sup><br><i>If other, specify:</i> _____                                                                                                                                                                                                                                                                                                                                                                                                                                                                                                                                                                                                                                                                              | __    |
| Q 1.5                                       | <b>Education level:</b><br><input type="checkbox"/> Unschooling <sup>1</sup> <input type="checkbox"/> Primary <sup>2</sup> <input type="checkbox"/> Secondary <sup>3</sup> <input type="checkbox"/> Higher <sup>4</sup>                                                                                                                                                                                                                                                                                                                                                                                                                                                                                                                                                                                                       | __    |
| Q 1.6                                       | <b>Current marital status:</b><br><input type="checkbox"/> Single <sup>1</sup> <input type="checkbox"/> Monogamous marriage <sup>2</sup> <input type="checkbox"/> Polygamous marriage <sup>3</sup> <input type="checkbox"/> Cohabiting <sup>4</sup><br><input type="checkbox"/> Divorced <sup>5</sup> <input type="checkbox"/> Widow(er) <sup>6</sup>                                                                                                                                                                                                                                                                                                                                                                                                                                                                         | __    |
| Q 1.7                                       | <b>HIV status upon entering prison:</b><br><input type="checkbox"/> Positive <sup>1</sup> <input type="checkbox"/> Negative <sup>2</sup> <input type="checkbox"/> Indeterminate <sup>3</sup> <input type="checkbox"/> Not done <sup>4</sup>                                                                                                                                                                                                                                                                                                                                                                                                                                                                                                                                                                                   | __    |
| Q 1.8                                       | <b>If HIV status known, date of HIV test :</b>  __ __ __  /  __ __ __  /  __ __ __ __ __ __ <br><input type="checkbox"/> Does not know <sup>99</sup>                                                                                                                                                                                                                                                                                                                                                                                                                                                                                                                                                                                                                                                                          |       |
| Q 1.9                                       | <b>How many meals do you regularly eat per day?</b><br><input type="checkbox"/> No meal <sup>1</sup> <input type="checkbox"/> Only one meal <sup>2</sup> <input type="checkbox"/> Two meals <sup>3</sup> <input type="checkbox"/> Three meals <sup>4</sup> <input type="checkbox"/> More than three meals <sup>5</sup>                                                                                                                                                                                                                                                                                                                                                                                                                                                                                                        | __    |
| Q 1.10                                      | <b>Where do the meals you eat in your cell mostly come from?</b><br><i>(Many answers possible)</i><br><input type="checkbox"/> Only the prison food <input type="checkbox"/> I cook my own food<br><input type="checkbox"/> Group meals among fellow inmates <input type="checkbox"/> Other<br><i>If other, specify:</i> _____                                                                                                                                                                                                                                                                                                                                                                                                                                                                                                |       |
| Q 1.11                                      | <b>Where does the water you drink in your cell mostly come from?</b><br><input type="checkbox"/> Tap water <sup>1</sup> <input type="checkbox"/> Mineral water <sup>2</sup> <input type="checkbox"/> Packaged water of unknown origin <sup>3</sup> <input type="checkbox"/> Other <sup>4</sup><br><i>If other, specify:</i> _____                                                                                                                                                                                                                                                                                                                                                                                                                                                                                             | __    |
| <b>2 - PAST MEDICAL HISTORY</b>             |                                                                                                                                                                                                                                                                                                                                                                                                                                                                                                                                                                                                                                                                                                                                                                                                                               |       |
| Q 2.1                                       | <b>In the past, did you have a disease requiring a treatment for many months?</b><br><input type="checkbox"/> Yes <sup>1</sup> <input type="checkbox"/> No <sup>0</sup>                                                                                                                                                                                                                                                                                                                                                                                                                                                                                                                                                                                                                                                       | __    |
| Q 2.1 A                                     | <b>If yes, was it a pulmonary infection?</b><br><input type="checkbox"/> Yes <sup>1</sup> <input type="checkbox"/> No <sup>0</sup>                                                                                                                                                                                                                                                                                                                                                                                                                                                                                                                                                                                                                                                                                            | __    |
| Q 2.1 B                                     | <b>Is yes, which one?</b> _____                                                                                                                                                                                                                                                                                                                                                                                                                                                                                                                                                                                                                                                                                                                                                                                               |       |
| Q 2.2                                       | <b>Since you are in prison, have you heard that another inmate in your cell has Tuberculosis?</b><br><input type="checkbox"/> Yes <sup>1</sup> <input type="checkbox"/> No <sup>0</sup>                                                                                                                                                                                                                                                                                                                                                                                                                                                                                                                                                                                                                                       | __    |
| Q 2.3                                       | <b>Have you ever had tuberculosis?</b><br><input type="checkbox"/> Yes <sup>1</sup> <input type="checkbox"/> No <sup>0</sup>                                                                                                                                                                                                                                                                                                                                                                                                                                                                                                                                                                                                                                                                                                  | __    |
| Q 2.3 A                                     | <b>If yes, TB treatment start date:</b><br> __ __ __  /  __ __ __  /  __ __ __   __ __ __ <br><input type="checkbox"/> Does not know <sup>99</sup>                                                                                                                                                                                                                                                                                                                                                                                                                                                                                                                                                                                                                                                                            |       |

|       |                                |                                                                                                                                                                                                                                                                                                                                                                                                                            |                                                                                                                                                      |         |
|-------|--------------------------------|----------------------------------------------------------------------------------------------------------------------------------------------------------------------------------------------------------------------------------------------------------------------------------------------------------------------------------------------------------------------------------------------------------------------------|------------------------------------------------------------------------------------------------------------------------------------------------------|---------|
|       | Q 2.3 B                        | Treatment duration:  __ _  months<br>99                                                                                                                                                                                                                                                                                                                                                                                    | <input type="checkbox"/> Does not know                                                                                                               |         |
| Q 2.4 | Do you have asthma?            |                                                                                                                                                                                                                                                                                                                                                                                                                            | <input type="checkbox"/> Yes <sup>1</sup> <input type="checkbox"/> No <sup>0</sup>                                                                   | _       |
| Q 2.5 | Do you have diabetes?          |                                                                                                                                                                                                                                                                                                                                                                                                                            | <input type="checkbox"/> Yes <sup>1</sup> <input type="checkbox"/> No <sup>0</sup>                                                                   | _       |
|       | Q 2.5 A                        | If yes, are you currently on anti-diabetic therapy?                                                                                                                                                                                                                                                                                                                                                                        | <input type="checkbox"/> Yes <sup>1</sup> <input type="checkbox"/> No <sup>0</sup>                                                                   | _       |
|       | Q 2.5 B                        | If currently on anti-diabetic therapy, specify the type of therapy:<br>_____                                                                                                                                                                                                                                                                                                                                               |                                                                                                                                                      |         |
| Q 2.6 | Have you ever smoked tobacco?  |                                                                                                                                                                                                                                                                                                                                                                                                                            | <input type="checkbox"/> No <sup>1</sup> <input type="checkbox"/> Yes, in the past <sup>2</sup> <input type="checkbox"/> Yes, currently <sup>3</sup> | _       |
|       | Q 2.6 A                        | If currently smoking, how often did you smoke tobacco in the last 30 days?<br><input type="checkbox"/> Only 1 to 3 times <sup>1</sup> <input type="checkbox"/> 1 to 3 times a week <sup>2</sup> <input type="checkbox"/> 4 to 6 times a week <sup>3</sup><br><input type="checkbox"/> Once a day <sup>4</sup> <input type="checkbox"/> 2 to 3 times a day <sup>5</sup> <input type="checkbox"/> 4 times a day <sup>6</sup> |                                                                                                                                                      | _       |
|       | Q 2.6B                         | How many cigarettes do you smoke per day?                                                                                                                                                                                                                                                                                                                                                                                  | _ _ _ _  cigarettes                                                                                                                                  | _ _ _ _ |
| Q 2.7 | Is it your first imprisonment? |                                                                                                                                                                                                                                                                                                                                                                                                                            | <input type="checkbox"/> Yes <sup>1</sup> <input type="checkbox"/> No <sup>0</sup>                                                                   | _       |
|       | Q 2.7 A                        | If "no", what was the length of your previous imprisonment?<br><input type="checkbox"/> Less than 3 months <sup>1</sup> <input type="checkbox"/> 3 to 6 months <sup>2</sup> <input type="checkbox"/> 6 to 12 months <sup>3</sup><br><input type="checkbox"/> 1 to 2 years <sup>4</sup> <input type="checkbox"/> More than 2 years <sup>5</sup>                                                                             |                                                                                                                                                      | _       |

**SURVEY FORM-TO BE COMPLETED BY- THE PHYSICIAN**

**3- CLINICAL CHARACTERISTICS**

|       |                                  |                                                                                                                                               |         |
|-------|----------------------------------|-----------------------------------------------------------------------------------------------------------------------------------------------|---------|
| Q 3.1 | Weight:  _ _ _  kg               |                                                                                                                                               | _ _ _ _ |
| Q 3.2 | Height:  _ _ _  cm               |                                                                                                                                               | _ _ _ _ |
| Q 3.3 | Temperature:  _ _ _ ,  _  degree |                                                                                                                                               | _ _ _ _ |
| Q 3.4 | Symptoms:                        |                                                                                                                                               |         |
|       | Q 3.4.1                          | Cough more than 2 weeks ago or cough in the last month?<br><input type="checkbox"/> Yes <sup>1</sup> <input type="checkbox"/> No <sup>0</sup> | _       |
|       | Q 3.4.2                          | Weight loss above 10% of body weight?<br><input type="checkbox"/> Yes <sup>1</sup> <input type="checkbox"/> No <sup>0</sup>                   | _       |
|       | Q 3.4.3                          | Recent loss of appetite:<br><input type="checkbox"/> Yes <sup>1</sup> <input type="checkbox"/> No <sup>0</sup>                                | _       |
|       | Q 3.4.4                          | Chest pain:<br><input type="checkbox"/> Yes <sup>1</sup> <input type="checkbox"/> No <sup>0</sup>                                             | _       |
|       | Q 3.4.5                          | Fever more than 2 weeks ago:<br><input type="checkbox"/> Yes <sup>1</sup> <input type="checkbox"/> No <sup>0</sup>                            | _       |

**4- Decision after performing chest X-ray and HIV test**

|       |                                            |                                                                                             |   |
|-------|--------------------------------------------|---------------------------------------------------------------------------------------------|---|
| Q 4.1 | At least one clinical symptom:             | <input type="checkbox"/> Yes <sup>1</sup> <input type="checkbox"/> No <sup>0</sup>          | _ |
| Q 4.2 | Positive HIV test or past medical history: | <input type="checkbox"/> Yes <sup>1</sup> <input type="checkbox"/> No <sup>0</sup>          | _ |
| Q 4.3 | Chest X-ray:                               | <input type="checkbox"/> Abnormal <sup>1</sup> <input type="checkbox"/> Normal <sup>0</sup> | _ |
| Q 4.4 | Positive D1 sputum                         | <input type="checkbox"/> Yes <sup>1</sup> <input type="checkbox"/> No <sup>0</sup>          | _ |

*In case of positive answer to at least one of the previous questions, patient sputum samples should be sent to CeDReS for direct examination and culture*

|       |                                                                                                                                |                                                            |   |
|-------|--------------------------------------------------------------------------------------------------------------------------------|------------------------------------------------------------|---|
| Q 4.5 | Have sputum samples been sent to CeDReS?<br><input type="checkbox"/> Yes <sup>1</sup> <input type="checkbox"/> No <sup>0</sup> |                                                            | _ |
|       | Q 4.5 A                                                                                                                        | If yes, date of submission:  _ _ _  /  _ _ _  /  _ _ _ _ _ |   |
|       | Q 4.5 B                                                                                                                        | If no, specify the reasons: _____<br>_____                 |   |

**Investigator's name and signature:**

**Physician's name and signature:**
